# Supplementary material
Source: PubMed Central journal article supplement (PMC4819971)
Supplement: NIHMS764248-supplement-supplemental_figures.pdf [file NIHMS764248-supplement-supplemental_figures.pdf]

**PDFF** 15 (1-36) %

| <b>DWI Parameter</b>         | <b>CMA</b>     | <b>P</b> | <b>BLN</b>      | <b>P</b> |
|------------------------------|----------------|----------|-----------------|----------|
| <i>D</i> [ $10^{-3}mm^2/s$ ] | 1.2 (0.88-1.6) | <0.001   | 0.89 (0.58-1.1) | <0.001   |
| <i>F</i> [%]                 | 18 (5 - 34)    | <0.001   | 19 (2.3-35)     | <0.001   |

**Table S1 – Distribution of PDFF and of IVIM parameters after fat fraction adjustment.** Mean and range of each parameter is given. P-value corresponds to paired student's t-test between fat fraction-adjusted parameter versus unadjusted parameter.

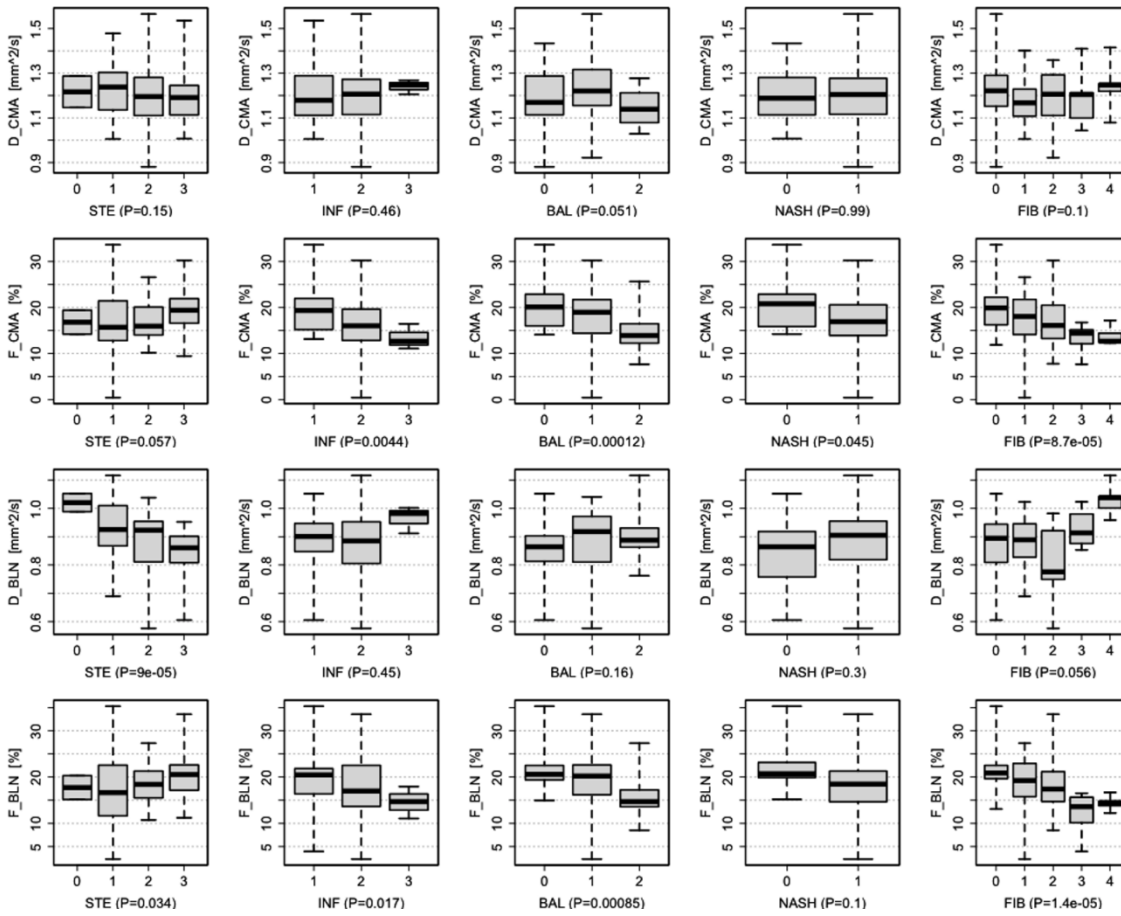

**Figure S1 – Trend tests after fat fraction adjustment.** Trends in IVIM parameters (D middle, F bottom) after fat fraction adjustment for each histologic feature (STE: steatosis, INF: inflammation, BAL: ballooning, NASH score, and FIB: fibrosis) are shown above. The barplot indicates the minimum, 1<sup>st</sup>, 2<sup>nd</sup>, 3<sup>rd</sup> quartiles, and maximum value of each DWI parameter for each observed score of histologic feature. Each plot is annotated with the p-value of the Jonckheere-Terpstra test for trends or the p-value of the Wilcoxon signed rank test for NASH. Parameters derived from the LS (top) and BLN (bottom) reconstruction methods are shown.

| Regression |             | FF Adjusted CMA Reconstruction DWI -Derived Parameter |                                   |
|------------|-------------|-------------------------------------------------------|-----------------------------------|
| Model      | Coefficient | D                                                     | F                                 |
| 1          | Intercept   | 1.285 ± 0.064                                         | 21.209 ± 2.397                    |
|            | STE         | -0.015 ± 0.017, P=0.393                               | <b>1.476 ± 0.659, P=0.028 *</b>   |
|            | INF         | 0.015 ± 0.030, P=0.615                                | -1.342 ± 1.138, P=0.241           |
|            | BAL         | -0.023 ± 0.030, P=0.442                               | -2.245 ± 1.145, P=0.053           |
|            | FIB         | -0.005 ± 0.016, P=0.750                               | -0.562 ± 0.590, P=0.344           |
| 2          | Intercept   | 1.233 ± 0.088                                         | 22.818 ± 3.386                    |
|            | STE         | -0.020 ± 0.017, P=0.244                               | 1.150 ± 0.649, P=0.080            |
|            | NASH        | 0.029 ± 0.048, P=0.541                                | -3.094 ± 1.833, P=0.095           |
|            | FIB         | -0.012 ± 0.012, P=0.336                               | <b>-1.327 ± 0.472, P=0.006 **</b> |

  

| Regression |             | FF Adjusted BLN Reconstruction DWI -Derived Parameter |                                      |
|------------|-------------|-------------------------------------------------------|--------------------------------------|
| Model      | Coefficient | D                                                     | F                                    |
| 1          | Intercept   | 0.952 ± 0.046                                         | 21.026 ± 2.604                       |
|            | STE         | <b>-0.046 ± 0.013, P=0.0004 ***</b>                   | 1.406 ± 0.715, P=0.053 .             |
|            | INF         | -0.006 ± 0.022, P=0.770                               | -0.659 ± 1.236, P=0.595              |
|            | BAL         | 0.030 ± 0.022, P=0.178                                | -1.252 ± 1.244, P=0.317              |
|            | FIB         | 0.009 ± 0.011, P=0.410                                | <b>-1.410 ± 0.641, P=0.031 *</b>     |
| 2          | Intercept   | 0.894 ± 0.063                                         | 22.938 ± 3.599                       |
|            | STE         | <b>-0.047 ± 0.012, P=0.0001 ***</b>                   | 1.305 ± 0.690, P=0.062 .             |
|            | NASH        | 0.057 ± 0.034, P=0.101                                | -2.407 ± 1.948, P=0.220              |
|            | FIB         | 0.012 ± 0.009, P=0.160                                | <b>-1.753 ± 0.502, P= 0.0007 ***</b> |

**Table S2 – Multiple Linear Regression Tables after Fat Fraction Adjustment.** The coefficient ± standard error and significance of the effects of each histologic feature of NAFLD are reported above for both reconstruction methods and both model after fat fraction adjustment. The p-value range is specified by the number of adjacent asterisks, as follows: \*\*\* = 0-0.001, \*\* = 0.001-0.010, \* = 0.010-0.050.
